# Supplementary material
Source: publisher figshare collection journal article supplement (https://karger.figshare.com/ndownloader/files/8879956)
Supplement: Supplementary file 1 [file 8879956]

**Supplemental Table 1. Cerebral and renal rSO2 and FTOE in the entire study group**

|  | **Cerebral rSO2 (%)** | **Cerebral FTOE** | **Renal rSO2 (%)** | **Renal FTOE** |
| --- | --- | --- | --- | --- |
| *Day 1* | 67 (61-77) | 0.28 (0.20-0.34) | 72 (62-83) | 0.21 (0.16-0.31) |
| *Day 2* | 70 (64-81) | 0.26 (0.15-0.31) | 65 (62-76) | 0.31 (0.18-0.34) |
| *Day 3* | 72 (64-77) | 0.23 (0.20-0.33) | 64 (54-83) | 0.31 (0.13-0.39) |

Values are displayed as median (IQR). rSO2, regional tissue oxygen saturation; FTOE, fractional tissue oxygen extraction.

**Supplemental Table 2. Cerebral and renal rSO2 and FTOE in the subgroups**

|  | **Antegrade blood flow** | | | | **Retrograde blood flow** | | | |
| --- | --- | --- | --- | --- | --- | --- | --- | --- |
|  | Cerebral | | Renal | | Cerebral | | Renal | |
|  | *rSO2 (%)* | *FTOE* | *rSO2 (%)* | *FTOE* | *rSO2 (%)* | *FTOE* | *rSO2 (%)* | *FTOE* |
| *Day 1* | 70  (65-79) | 0.25  (0.13-0.33) | 67  (60-80) | 0.27  (0.19-0.38) | 62  (57-69) | 0.33  (0.26-0.38) | 77  (72-84) | 0.20  (0.09-0.21) |
| *Day 2* | 71  (65-82) | 0.23  (0.12-0.31) | 65  (62-81) | 0.31  (0.18-0.35) | 67  (64-75) | 0.27  (0.17-0.32) | 68  (62-76) | 0.28  (0.18-0.34) |
| *Day 3* | 74  (64-79) | 0.21  (0.14-0.34) | 64  (54-84) | 0.32  0.13-0.39) | 69  (64-75) | 0.24  (0.23-0.31) | 64  (56-79) | 0.29  (0.16-0.42) |
|  | **Diastolic backflow absent** | | | | **Diastolic backflow present** | | | |
|  | Cerebral | | Renal | | Cerebral | | Renal | |
|  | *rSO2 (%)* | *FTOE* | *rSO2 (%)* | *FTOE* | *rSO2 (%)* | *FTOE* | *rSO2 (%)* | *FTOE* |
| *Day 1* | 70  (59-85) | 0.25  (0.08-0.35) | 68  (53-80) | 0.24  (0.17-0.31) | 62  (58-70) | 0.34  (0.27-0.38) | 77  (68-86) | 0.18  (0.02-0.25) |
| *Day 2* | 76  (62-84) | 0.20  (0.11-0.34) | 65  (63-82) | 0.31  (0.17-0.33) | 65  (63-70) | 0.30  (0.27-0.32) | 64  (59-77) | 0.29  (0.18-0.35) |
| *Day 3* | 70  (63-81) | 0.27  (0.14-0.35) | 64  (60-84) | 0.32  (0.13-0.37) | 70  (62-73) | 0.24  (0.22-0.32) | 68  (63-86) | 0.27  (0.10-0.32) |

Values are displayed as median (IQR). rSO2, regional tissue oxygen saturation; FTOE, fractional tissue oxygen extraction.
